# Supplementary material
Source: PubMed Central journal article supplement (PMC9330278)
Supplement: jamapsychiatry-e221973-s001.pdf [file jamapsychiatry-e221973-s001.pdf]

## Supplementary Online Content

Lee YH, Liu Z, Fatori D, et al. Association of everyday discrimination with depressive symptoms and suicidal ideation during the COVID-19 pandemic. *JAMA Psychiatry*. Published online July 27, 2022. doi:10.1001/jamapsychiatry.2022.1973

**eTable 1.** Comparison of sociodemographic characteristics among the COPE respondents ( $N_{\text{respondent}} = 62,651$ ), stratified by self-reported race and ethnicity.

**eTable 2.** Distribution of the mean ratings on the Everyday Discrimination Scale by survey timing and self-reported race and ethnicity.

**eTable 3.** Distribution of depressive symptom severity (based on the PHQ-9 score) by survey timing.

**eTable 4.** Variations in the associations of everyday with moderate to severe depressive symptoms and suicidal ideation by the main reason for discrimination and survey timing.

**eTable 5.** Variations in the associations of everyday discrimination with moderate to severe depressive symptoms and suicidal ideation by the main reason for discrimination and pre-pandemic mood disorder diagnosis.

**eFigure 1.** Distribution of the mean item score on the Everyday Discrimination Scale among participants who reported everyday discrimination ( $N_{\text{respondent}} = 35,844$ ), stratified by survey timing and self-reported race and ethnicity.

**eFigure 2.** Variations in the associations of everyday discrimination with moderate to severe depressive symptoms and suicidal ideation by survey timing, estimated from mixed-effects models.

**eFigure 3.** Variations in the associations of everyday discrimination with moderate to severe depressive symptoms and suicidal ideation by pre-pandemic mood disorder diagnosis, estimated from mixed effect models.

### eMethods

### eReferences

This supplementary material has been provided by the authors to give readers additional information about their work.

**eTable 1.** Sociodemographic characteristics among the COPE respondents (N<sub>respondent</sub> = 62,651), stratified by self-reported race and ethnicity.

| <b>Categorical variables</b>                                              | Non-Hispanic Another single/More than one population (N=1,258) |          | Non-Hispanic Asian (N=1,778) |          | Non-Hispanic Black or African American (N=3,495) |          | Non-Hispanic White (N=50,705) |          |
|---------------------------------------------------------------------------|----------------------------------------------------------------|----------|------------------------------|----------|--------------------------------------------------|----------|-------------------------------|----------|
| <b>Sex assigned at birth</b>                                              |                                                                |          |                              |          |                                                  |          |                               |          |
| Male                                                                      | 408                                                            | 32.4%    | 672                          | 37.8%    | 742                                              | 21.2%    | 17,774                        | 35.1%    |
| Female                                                                    | 838                                                            | 66.6%    | 1,098                        | 61.8%    | 2,726                                            | 78.0%    | 32,644                        | 64.4%    |
| Not male, not female/Prefer not to answer, or skipped/No matching concept | 12                                                             | 1.0%     | 8                            | 0.4%     | 27                                               | 0.8%     | 287                           | 0.6%     |
| <b>Born in the United States</b>                                          | 982                                                            | 78.1%    | 764                          | 43.0%    | 3,208                                            | 91.8%    | 48,219                        | 95.1%    |
| <b>Employed</b>                                                           | 811                                                            | 64.5%    | 1,243                        | 69.9%    | 1,893                                            | 54.2%    | 27,015                        | 53.3%    |
| <b>Educational attainment</b>                                             |                                                                |          |                              |          |                                                  |          |                               |          |
| Less than college                                                         | 77                                                             | 6.1%     | 47                           | 2.6%     | 532                                              | 15.2%    | 3,305                         | 6.5%     |
| College or higher                                                         | 1,181                                                          | 93.9%    | 1,731                        | 97.4%    | 2,963                                            | 84.8%    | 47,400                        | 93.5%    |
| <b>Has health insurance</b>                                               | 1,212                                                          | 96.3%    | 1,730                        | 97.3%    | 3,270                                            | 93.6%    | 49,810                        | 98.2%    |
| <b>Owns a home</b>                                                        | 663                                                            | 52.7%    | 989                          | 55.6%    | 1,513                                            | 43.3%    | 37,871                        | 74.7%    |
| <b>Married/partnered</b>                                                  | 715                                                            | 56.8%    | 1,044                        | 58.7%    | 1,235                                            | 35.3%    | 33,721                        | 66.5%    |
| <b>Had COVID symptom(s)</b>                                               | 81                                                             | 6.4%     | 90                           | 5.1%     | 211                                              | 6.0%     | 2,330                         | 4.6%     |
| <b>Had prepandemic mood disorder diagnosis</b>                            | 77                                                             | 6.1%     | 47                           | 2.6%     | 245                                              | 7.0%     | 2,860                         | 5.6%     |
| <b>Continuous variables</b>                                               |                                                                |          |                              |          |                                                  |          |                               |          |
| <b>Age (in years)</b>                                                     | 49.9                                                           | 16.9     | 48.8                         | 16.4     | 55.8                                             | 13.8     | 60.9                          | 15.5     |
| <b>Number of co-resident</b>                                              | 0.5                                                            | 1.1      | 0.4                          | 0.9      | 0.6                                              | 1.1      | 0.3                           | 0.8      |
| <b>Income (in dollars)</b>                                                | 90,218.6                                                       | 63,240.2 | 99,843.9                     | 65,894.5 | 53,779.7                                         | 48,735.4 | 99,063.9                      | 57,220.4 |

**eTable 1.** Sociodemographic characteristics among the COPE respondents (N<sub>respondent</sub> = 62,651), stratified by self-reported race and ethnicity (continued).

| <b>Categorical variables</b>                                              | Hispanic Another single/More than one population (N=119) |          | Hispanic Asian (N=35) |          | Hispanic Black (N=75) |          | Hispanic Race not indicated (N=3,071) |          | Hispanic White (N=887) |          |
|---------------------------------------------------------------------------|----------------------------------------------------------|----------|-----------------------|----------|-----------------------|----------|---------------------------------------|----------|------------------------|----------|
|                                                                           |                                                          |          |                       |          |                       |          |                                       |          |                        |          |
| <b>Sex assigned at birth</b>                                              |                                                          |          |                       |          |                       |          |                                       |          |                        |          |
| Male                                                                      | 32                                                       | 26.9%    | 9                     | 25.7%    | 21                    | 28.0%    | 806                                   | 26.2%    | 269                    | 30.3%    |
| Female                                                                    | 87                                                       | 73.1%    | 26                    | 74.3%    | 54                    | 72.0%    | 2,254                                 | 73.4%    | 615                    | 69.3%    |
| Not male, not female/Prefer not to answer, or skipped/No matching concept | 0                                                        | 0.0%     | 0                     | 0.0%     | 0                     | 0.0%     | 11                                    | 0.4%     | 3                      | 0.3%     |
| <b>Born in the United States</b>                                          | 92                                                       | 77.3%    | 23                    | 65.7%    | 57                    | 76.0%    | 1,548                                 | 50.4%    | 740                    | 83.4%    |
| <b>Employed</b>                                                           | 85                                                       | 71.4%    | 23                    | 65.7%    | 40                    | 53.3%    | 1,949                                 | 63.5%    | 593                    | 66.9%    |
| <b>Educational attainment</b>                                             |                                                          |          |                       |          |                       |          |                                       |          |                        |          |
| Less than college                                                         | 8                                                        | 6.7%     | 0                     | 0.0%     | 12                    | 16.0%    | 630                                   | 20.5%    | 84                     | 9.5%     |
| College or higher                                                         | 111                                                      | 93.3%    | 35                    | 100.0%   | 63                    | 84.0%    | 2,441                                 | 79.5%    | 803                    | 90.5%    |
| <b>Has health insurance</b>                                               | 114                                                      | 95.8%    | 34                    | 97.1%    | 69                    | 92.0%    | 2,800                                 | 91.2%    | 859                    | 96.8%    |
| <b>Owns a home</b>                                                        | 43                                                       | 36.1%    | 14                    | 40.0%    | 16                    | 21.3%    | 1,209                                 | 39.4%    | 469                    | 52.9%    |
| <b>Married/partnered</b>                                                  | 62                                                       | 52.1%    | 20                    | 57.1%    | 31                    | 41.3%    | 1,677                                 | 54.6%    | 527                    | 59.4%    |
| <b>Had COVID symptom(s)</b>                                               | 9                                                        | 7.6%     | 3                     | 8.6%     | 6                     | 8.0%     | 305                                   | 9.9%     | 64                     | 7.2%     |
| <b>Had prepandemic mood disorder diagnosis</b>                            | 4                                                        | 3.4%     | 0                     | 0.0%     | 8                     | 10.7%    | 155                                   | 5.0%     | 41                     | 4.6%     |
| <b>Continuous variables</b>                                               |                                                          |          |                       |          |                       |          |                                       |          |                        |          |
| <b>Age (in years)</b>                                                     | 48.3                                                     | 15.0     | 44.6                  | 15.8     | 46.6                  | 12.4     | 49.1                                  | 14.5     | 48.2                   | 15.8     |
| <b>Number of co-resident</b>                                              | 0.5                                                      | 0.9      | 0.8                   | 1.1      | 0.8                   | 1.2      | 0.8                                   | 1.1      | 0.5                    | 0.9      |
| <b>Income (in dollars)</b>                                                | 77,479.0                                                 | 62,267.8 | 76,357.1              | 59,146.3 | 48,266.7              | 46,084.8 | 57,916.0                              | 51,865.7 | 88,633.0               | 61,487.4 |

**eTable 2.** Distribution of the mean ratings on the Everyday Discrimination Scale (ranging from 0 = *Never* to 3 = *Almost every day*) by survey timing and self-reported race and ethnicity.

| Survey timing    | Self-reported race and ethnicity                     | N     | Mean | Median | SD   | Min  | Max  |
|------------------|------------------------------------------------------|-------|------|--------|------|------|------|
| <b>May 2020</b>  | Non-Hispanic Another single/More than one population | 1126  | 0.60 | 0.44   | 0.60 | 0.11 | 3.00 |
|                  | Non-Hispanic Asian                                   | 1722  | 0.58 | 0.44   | 0.58 | 0.11 | 3.00 |
|                  | Non-Hispanic Black or African American               | 3295  | 0.69 | 0.56   | 0.69 | 0.11 | 3.00 |
|                  | Non-Hispanic White                                   | 31716 | 0.45 | 0.33   | 0.45 | 0.11 | 3.00 |
|                  | Hispanic Another single/More than one population     | 112   | 0.70 | 0.56   | 0.70 | 0.11 | 2.44 |
|                  | Hispanic Asian                                       | 40    | 0.68 | 0.67   | 0.68 | 0.11 | 1.56 |
|                  | Hispanic Black                                       | 89    | 0.97 | 0.78   | 0.97 | 0.11 | 2.88 |
|                  | Hispanic Race not indicated                          | 2185  | 0.61 | 0.44   | 0.61 | 0.11 | 3.00 |
| Hispanic White   | 806                                                  | 0.55  | 0.44 | 0.55   | 0.11 | 3.00 |      |
| <b>June 2020</b> | Non-Hispanic Another single/More than one population | 760   | 0.60 | 0.44   | 0.60 | 0.11 | 3.00 |
|                  | Non-Hispanic Asian                                   | 1151  | 0.57 | 0.44   | 0.57 | 0.11 | 2.78 |
|                  | Non-Hispanic Black or African American               | 2590  | 0.75 | 0.67   | 0.75 | 0.11 | 3.00 |
|                  | Non-Hispanic White                                   | 24548 | 0.45 | 0.33   | 0.45 | 0.11 | 3.00 |
|                  | Hispanic Another single/More than one population     | 78    | 0.59 | 0.56   | 0.59 | 0.11 | 1.56 |
|                  | Hispanic Asian                                       | 31    | 0.61 | 0.33   | 0.61 | 0.11 | 1.89 |
|                  | Hispanic Black                                       | 61    | 1.11 | 0.78   | 1.11 | 0.11 | 3.00 |
|                  | Hispanic Race not indicated                          | 1651  | 0.65 | 0.44   | 0.65 | 0.11 | 2.67 |
| Hispanic White   | 541                                                  | 0.61  | 0.44 | 0.61   | 0.11 | 3.00 |      |
| <b>July 2020</b> | Non-Hispanic Another single/More than one population | 760   | 0.68 | 0.56   | 0.68 | 0.11 | 2.78 |
|                  | Non-Hispanic Asian                                   | 1055  | 0.54 | 0.44   | 0.54 | 0.11 | 3.00 |

|                                                  |       |      |      |      |      |      |
|--------------------------------------------------|-------|------|------|------|------|------|
| Non-Hispanic Black or African American           | 2274  | 0.73 | 0.56 | 0.73 | 0.11 | 3.00 |
| Non-Hispanic White                               | 22916 | 0.47 | 0.33 | 0.47 | 0.11 | 3.00 |
| Hispanic Another single/More than one population | 72    | 0.72 | 0.56 | 0.72 | 0.11 | 1.60 |
| Hispanic Asian                                   | 21    | 0.50 | 0.33 | 0.50 | 0.22 | 0.89 |
| Hispanic Black                                   | 70    | 0.97 | 0.56 | 0.97 | 0.11 | 3.00 |
| Hispanic Race not indicated                      | 1783  | 0.65 | 0.44 | 0.65 | 0.11 | 3.00 |
| Hispanic White                                   | 585   | 0.60 | 0.44 | 0.60 | 0.11 | 2.67 |

**eTable 3.** Distribution of depressive symptom severity (based on the PHQ-9 score) by survey timing.

| Survey timing    | Level of depressive symptoms severity | N      | Prevalence |
|------------------|---------------------------------------|--------|------------|
| <b>May 2020</b>  | Minimal                               | 34,283 | 54.0%      |
|                  | Mild                                  | 16,216 | 25.5%      |
|                  | Moderate                              | 7,211  | 11.3%      |
|                  | Moderately severe                     | 3,683  | 5.8%       |
|                  | Severe                                | 2,142  | 3.4%       |
|                  | Moderate to severe, 10-27             | 13,036 | 20.5%      |
|                  | Suicidal ideation (item 9 > 0)        | 4,991  | 7.9%       |
| <b>June 2020</b> | Minimal                               | 27,494 | 55.8%      |
|                  | Mild                                  | 12,315 | 25.0%      |
|                  | Moderate                              | 5,275  | 10.7%      |
|                  | Moderately severe                     | 2,803  | 5.7%       |
|                  | Severe                                | 1,414  | 2.9%       |
|                  | Moderate to severe, 10-27             | 9,492  | 19.3%      |
|                  | Suicidal ideation (item 9 > 0)        | 3,735  | 7.6%       |
| <b>July 2020</b> | Minimal                               | 25,225 | 55.5%      |
|                  | Mild                                  | 11,164 | 24.5%      |
|                  | Moderate                              | 5,013  | 11.0%      |
|                  | Moderately severe                     | 2,580  | 5.7%       |
|                  | Severe                                | 1,508  | 3.3%       |
|                  | Moderate to severe, 10-27             | 9,101  | 20.0%      |
|                  | Suicidal ideation (item 9 > 0)        | 3,550  | 7.8%       |

**eTable 4.** Variations in the associations of everyday discrimination with moderate to severe depressive symptoms and suicidal ideation by the main reason for discrimination and survey timing. Regression estimates are presented in odds ratio with 95% confidence limits.

| Parameters:                                             | <i>Target Outcome and Reason for Discrimination:</i>         |                                       |                                         |                                       |
|---------------------------------------------------------|--------------------------------------------------------------|---------------------------------------|-----------------------------------------|---------------------------------------|
|                                                         | Moderate to severe depressive symptoms<br>(PHQ-9 score ≥ 10) |                                       | Suicidal ideation<br>(PHQ-9 item 9 > 0) |                                       |
|                                                         | Any reason                                                   | Race, ancestry, or<br>national origin | Any reason                              | Race, ancestry, or<br>national origin |
| Main effect of discrimination                           | 2.589 ****<br>[2.474, 2.710]                                 | 2.111 ****<br>[1.996, 2.232]          | 2.153 ****<br>[2.034, 2.279]            | 1.818 ***<br>[1.698, 1.947]           |
| Main effect of survey timing                            | 0.870 ***<br>[0.848, 0.893]                                  | 0.928 ***<br>[0.894, 0.964]           | 0.953 *<br>[0.918, 0.989]               | 0.955<br>[0.902, 1.011]               |
| Interaction between<br>discrimination and survey timing | 0.916 ****<br>[0.892, 0.940]                                 | 0.930 ****<br>[0.898, 0.964]          | 0.994<br>[0.962, 1.027]                 | 1.014<br>[0.970, 1.061]               |
| N <sub>observation</sub>                                | 158326                                                       | 68927                                 | 158326                                  | 68927                                 |
| N <sub>respondent</sub>                                 | 62502                                                        | 42006                                 | 62502                                   | 42006                                 |

\*\*\*\* p < 0.0005; \*\*\* p < 0.001; \*\* p < 0.01; \* p < 0.05.

**eTable 5.** Variations in the associations of everyday discrimination (modeled as the mean item score) with moderate to severe depressive symptoms and suicidal ideation by the main reason for discrimination and prepandemic mood disorder diagnosis. Regression estimates are presented in odds ratio with 95% confidence limits.

|                                                                                  | <i>Target Outcome and Reason for Discrimination</i>                  |                                               |                                                    |                                               |
|----------------------------------------------------------------------------------|----------------------------------------------------------------------|-----------------------------------------------|----------------------------------------------------|-----------------------------------------------|
|                                                                                  | <b>Moderate to severe depressive symptoms<br/>(PHQ-9 score ≥ 10)</b> |                                               | <b>Suicidal ideation<br/>(PHQ-9 item 9 &gt; 0)</b> |                                               |
| <b>Parameters:</b>                                                               | <b>Any reason</b>                                                    | <b>Race, ancestry, or<br/>national origin</b> | <b>Any reason</b>                                  | <b>Race, ancestry, or<br/>national origin</b> |
| Main effect of discrimination                                                    | 2.684 ****<br>[2.558, 2.816]                                         | 2.130 ****<br>[2.010, 2.257]                  | 2.240 ****<br>[2.108, 2.380]                       | 1.877 ****<br>[1.745, 2.018]                  |
| Main effect of<br>prepandemic<br>mood disorder diagnosis                         | 4.538 ****<br>[3.843, 5.360]                                         | 3.968 ****<br>[3.287, 4.790]                  | 2.677 ****<br>[2.150, 3.334]                       | 2.387 ****<br>[1.833, 3.108]                  |
| Interaction between discrimination<br>and prepandemic<br>mood disorder diagnosis | 0.636 ****<br>[0.550, 0.735]                                         | 0.831 *<br>[0.697, 0.991]                     | 0.719 ****<br>[0.607, 0.853]                       | 0.770 *<br>[0.631, 0.940]                     |
| N <sub>observation</sub>                                                         | 158326                                                               | 68927                                         | 158326                                             | 68927                                         |
| N <sub>respondent</sub>                                                          | 62502                                                                | 42006                                         | 62502                                              | 42006                                         |

\*\*\*\* p < 0.0005; \*\*\* p < 0.001; \*\* p < 0.01; \* p < 0.05.



**eFigure 1.** Distribution of the mean item score on the Everyday Discrimination Scale (modeled as the mean item score, ranging from 0 = *Never* to 3 = *Almost every day*) among participants who reported everyday discrimination ( $N_{\text{respondent}} = 35,844$ ), stratified by survey timing and self-reported race and ethnicity.

(a) Mean ratings on the Everyday Discrimination Scale<sup>‡</sup> by survey timing and self-reported race and ethnicity.

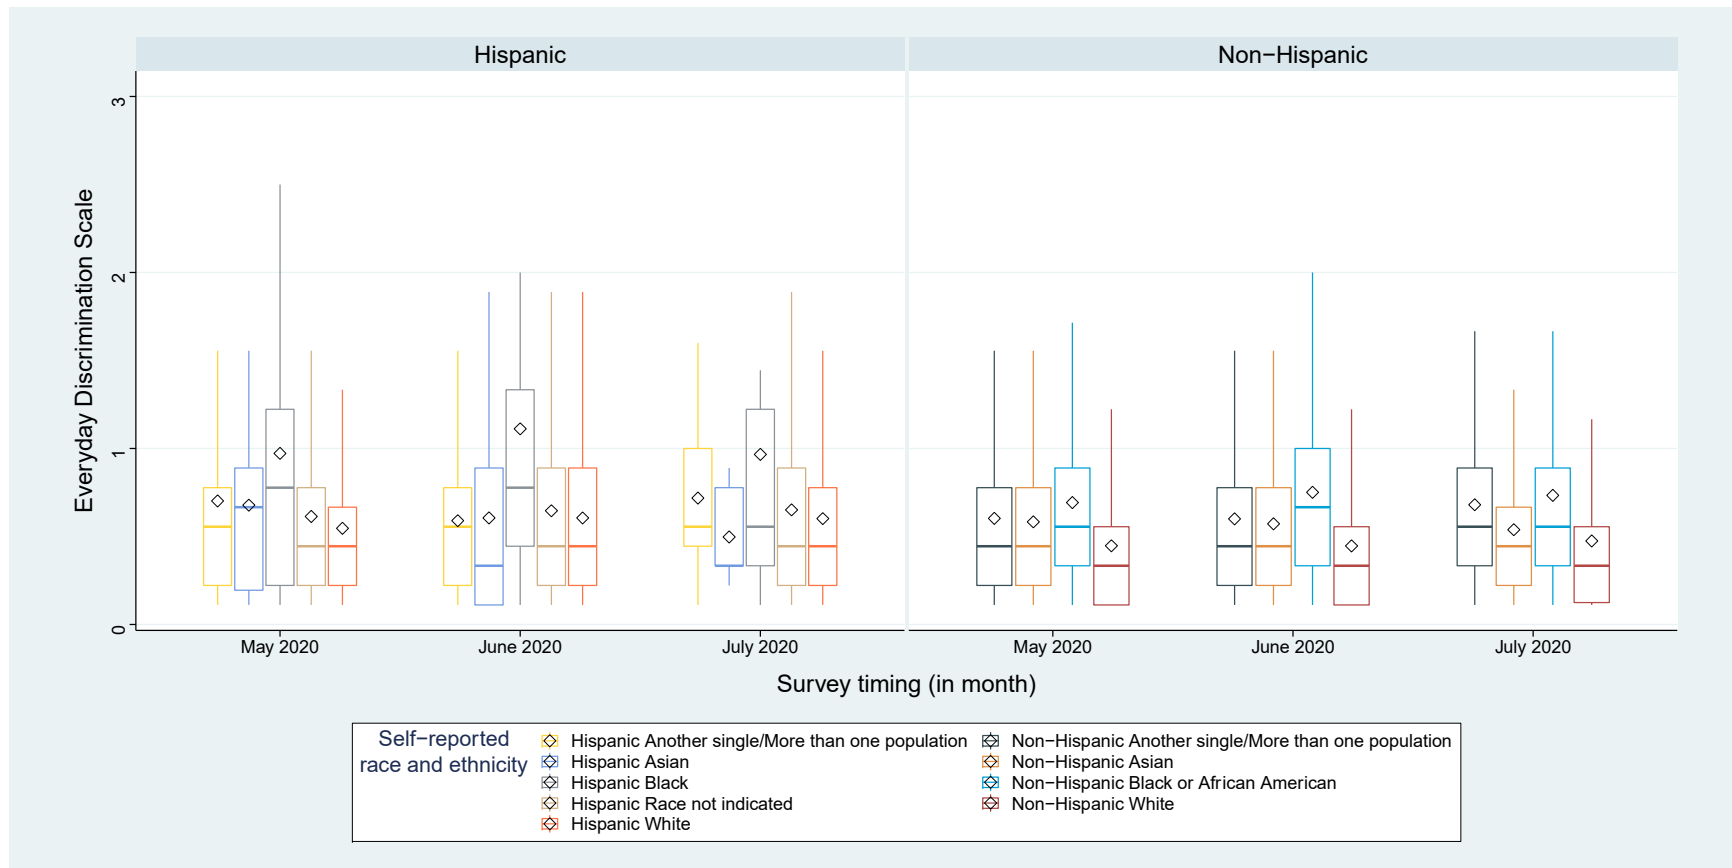

<sup>‡</sup> An open diamond shape indicates a mean value for a given stratum of self-reported race and ethnicity at a given survey timing.

(b) Distribution of main reason(s) for everyday discrimination by survey timing and self-reported race and ethnicity<sup>‡</sup>.

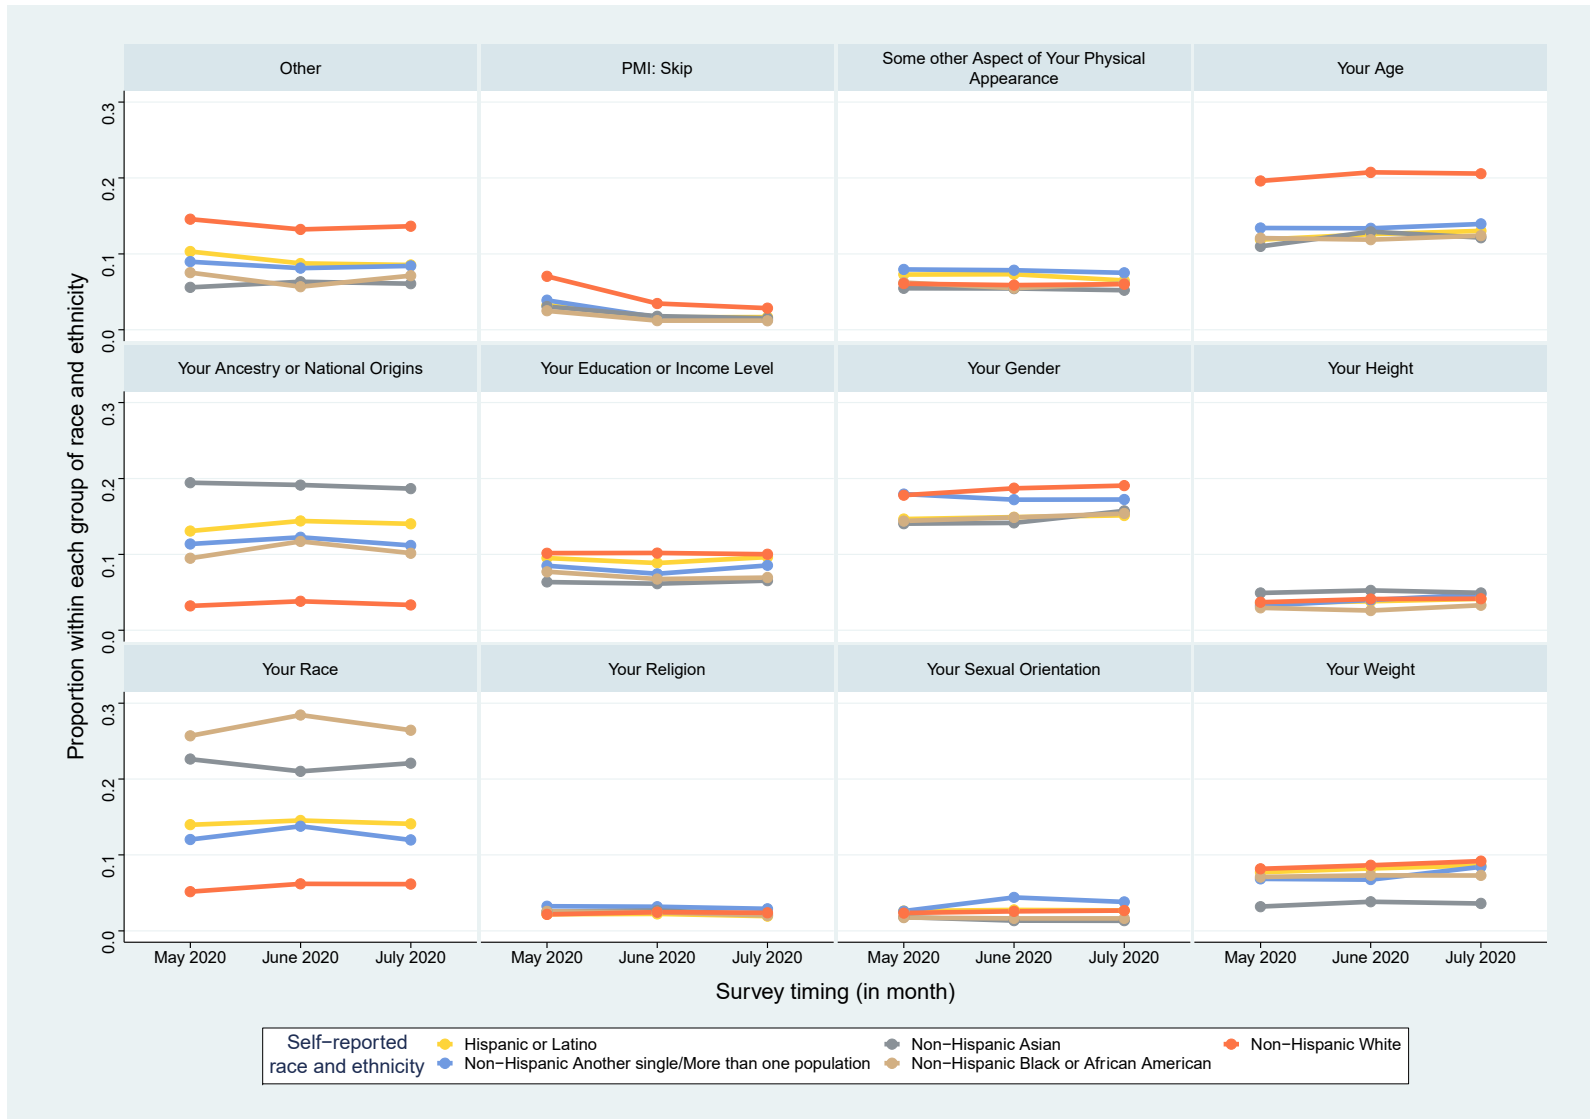

<sup>‡</sup>We collapsed the five subgroups of participants self-identifying as Hispanic or Latino into a single group due to limited sample size.

**eFigure 2.** Variations in the associations of everyday discrimination (modeled as the mean item score, ranging from 0 = *Never* to 3 = *Almost every day*) with moderate to severe depressive symptoms and suicidal ideation by survey timing, estimated from mixed-effects models. Numeric estimates from the mixed-effect logistic regression models can be found in **eTable 4**.

Target outcome: Moderate to severe depressive symptoms (PHQ-9 total score  $\geq 10$ )

(a) Everyday discrimination due to any reason

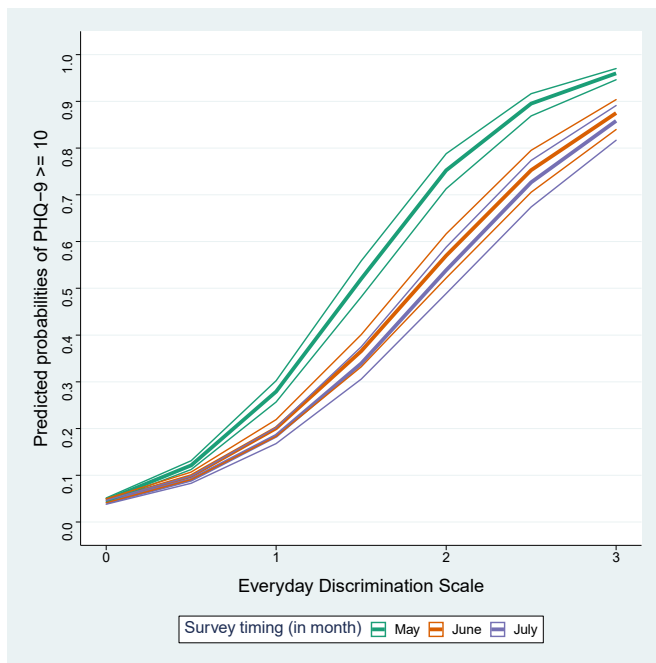

(b) Everyday discrimination due to race, ancestry, or national origin

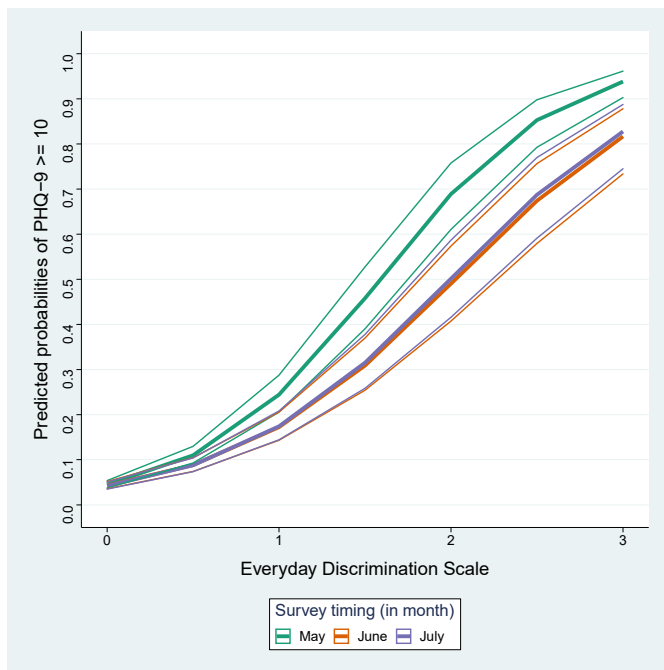

Target outcome: Suicidal ideation (PHQ-9 item 9 > 0)

(c) Everyday discrimination due to any reason

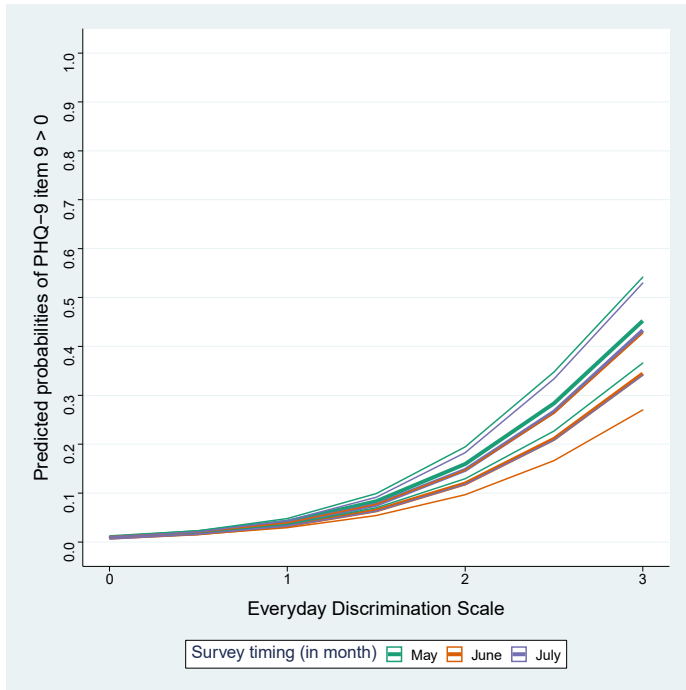

(d) Everyday discrimination due to race, ancestry, or national origin

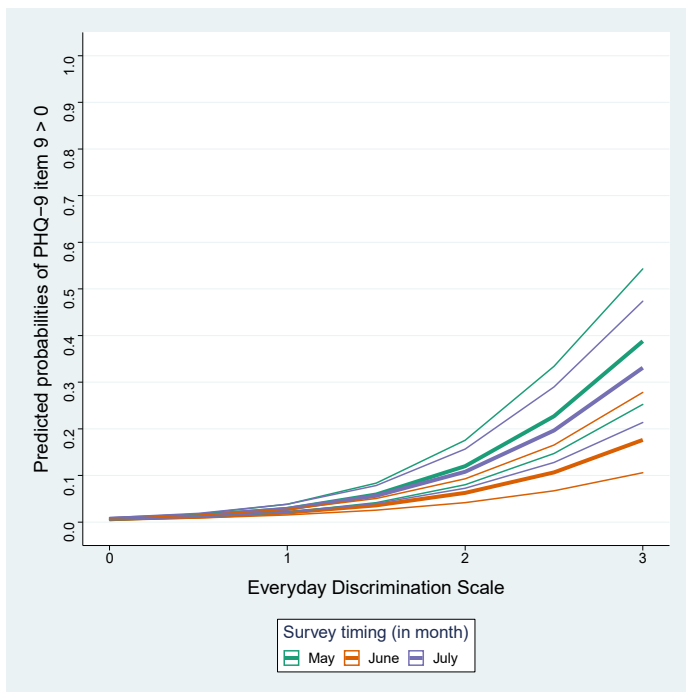

**eFigure 3.** Variations in the associations of everyday discrimination (modeled as the mean item score, ranging from 0 = *Never* to 3 = *Almost every day*) with moderate to severe depressive symptoms and suicidal ideation by prepandemic mood disorder diagnosis, estimated from mixed effect models. Numeric estimates from the mixed-effect logistic regression models can be found in **eTable 5**.

Target outcome: Moderate to severe depressive symptoms (PHQ-9 total score  $\geq 10$ )

(a) Everyday discrimination due to any reason

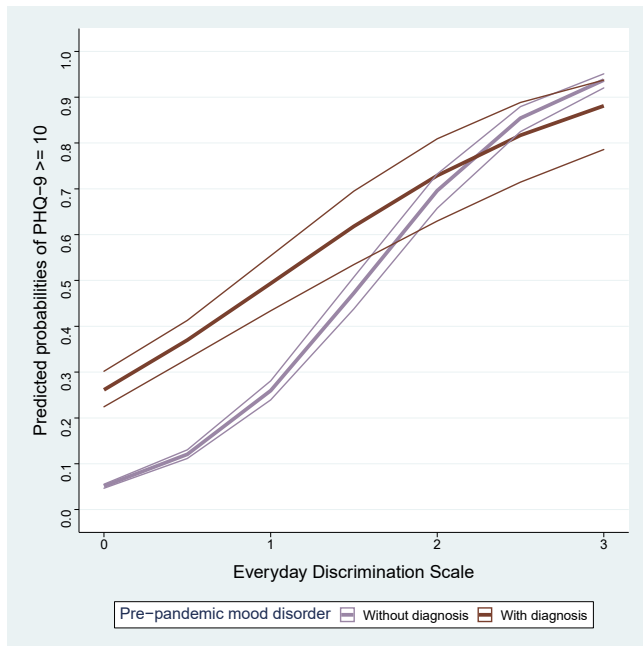

(b) Everyday discrimination due to race, ancestry, or national origin

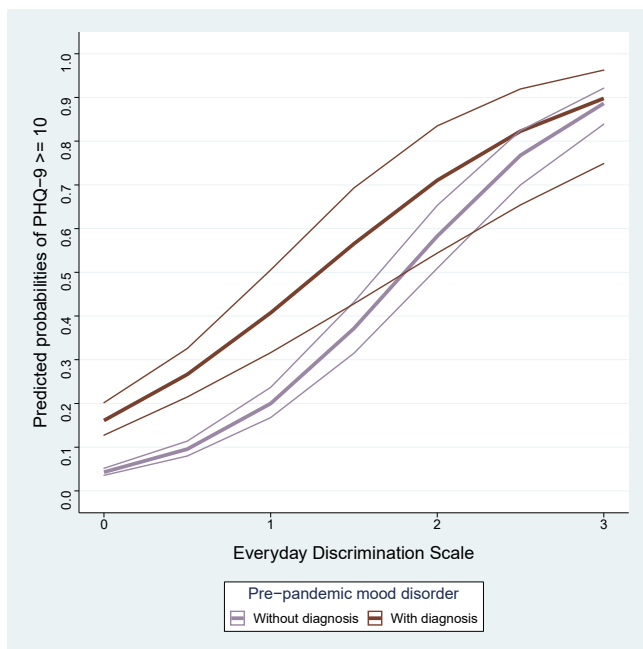

Target outcome: Suicidal ideation (PHQ-9 item 9 > 0)

(c) Everyday discrimination due to any reason

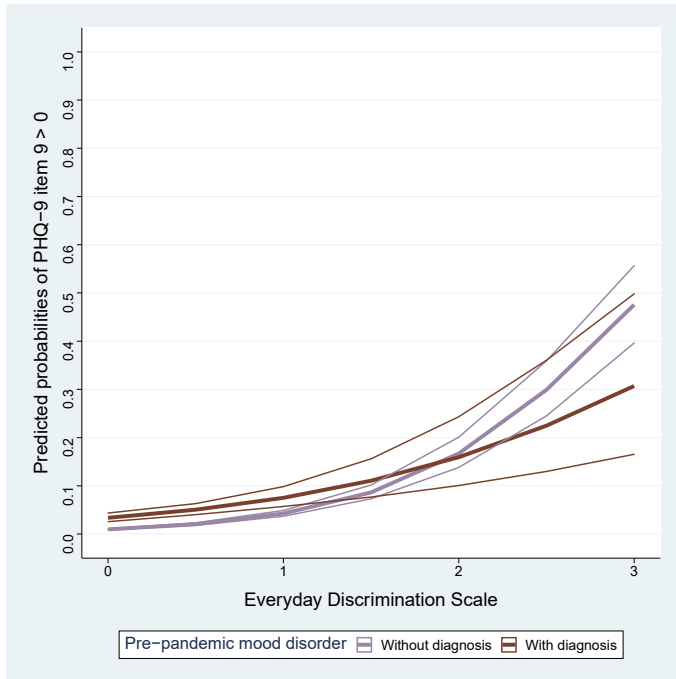

(d) Everyday discrimination due to race, ancestry, or national origin

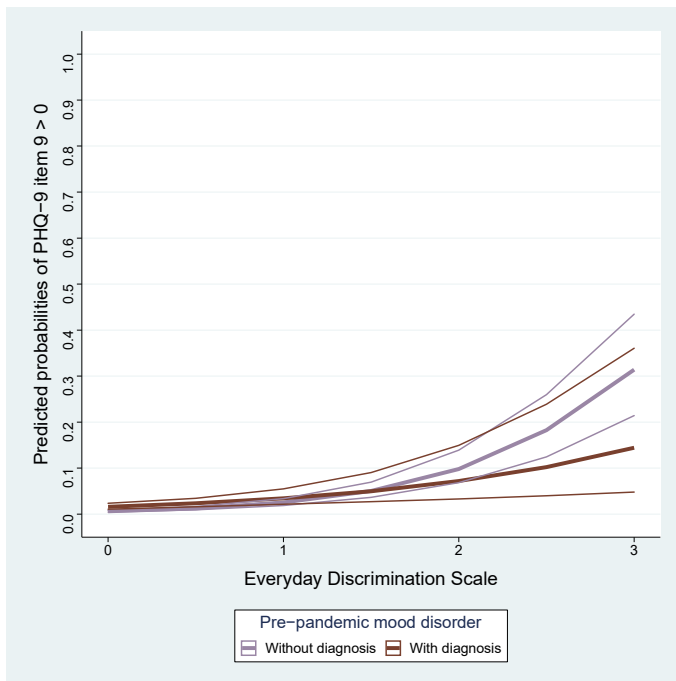

## **eMethods.**

### *Cohort description*

To date, the *All of Us* Research Program (hereafter, AoU) has enrolled more than 400,000 participants, of which more than 80% are individuals from communities that have been underrepresented in biomedical research, such as people identifying as Asian, Black or African American, Hispanic or Latino race and ethnicity, LGBTQ+ sexual orientation and gender identities, and those with less than high school education or household incomes at the federal poverty level (1). The diversity of the AoU cohort provides a unique opportunity to examine the impact of discrimination on mental health outcomes and its potential variations across sociodemographic and environmental contexts (2). However, the AoU Research Program currently administers the consent form and questionnaires in either English or Spanish, potentially limiting participation by those with limited proficiency in those languages.

### *Extraction of prepandemic mood disorder diagnosis*

In the *All of Us* Research Program, electronic health records (EHRs) were available from a subset of participants who authorized linkage of electronic health records by signing the HIPAA Authorization for Research EHR/Part 2 Supplement Form (3,4). In the current study, we used these linked EHRs to establish whether respondents had a prepandemic history of mood disorder. Participants were considered as cases if they had two or more qualifying diagnostic codes (identified based on Systematized Nomenclature of Medicine (SNOMED) code 46206005) within one year prior to January 21<sup>st</sup>, 2020—the date of the first reported COVID-19 case in the United States (5). Of 62,551 participants in the study sample, 40,438 (64.6%) had linked EHRs, and those who did not meet the criteria or, to be conservative, did not have linked EHRs were considered as non-cases.

## eReferences

1. All of Us Research Program Investigators, Denny JC, Rutter JL, Goldstein DB, Philippakis A, Smoller JW, et al. The “All of Us” Research Program. *N Engl J Med*. 2019 Aug 15;381(7):668–76.
2. Mapes BM, Foster CS, Kusnoor SV, Epelbaum MI, AuYoung M, Jenkins G, et al. Diversity and inclusion for the All of Us research program: A scoping review. *PLoS One*. 2020 Jul 1;15(7):e0234962.
3. Denny J. All of Us Research Program HIPAA Authorization for Research EHR/Part 2 Supplement [Internet]. National Institutes of Health (NIH); IRB Approval Date: 06-21-2017. Available from: [https://allofus.nih.gov/sites/default/files/appendix\\_informed\\_consent\\_hipaa\\_ehr\\_part\\_2\\_supplement-stamped.pdf](https://allofus.nih.gov/sites/default/files/appendix_informed_consent_hipaa_ehr_part_2_supplement-stamped.pdf)
4. All of Us Research Program Protocol [Internet]. National Institutes of Health (NIH) — All of Us Research Program. 2020 [cited 2022 Apr 4]. Available from: <https://allofus.nih.gov/about/all-us-research-program-protocol>
5. First Travel-related Case of 2019 Novel Coronavirus Detected in United States [Internet]. Centers for Disease Control and Prevention; 2020 Jan [cited 2021 Oct 31]. Available from: <https://www.cdc.gov/media/releases/2020/p0121-novel-coronavirus-travel-case.html>
